# Supplementary material for: Oral hygiene practices and their socio-demographic correlates among Nepalese adult: evidence from non communicable diseases risk factors STEPS survey Nepal 2013
Source: PubMed Central journal article supplement (PMC5041565; doi:10.1186/s12903-016-0294-9), 2016-09-29
Supplement: 12903_2016_294_MOESM2_ESM.pdf [file 12903_2016_294_MOESM2_ESM.pdf]

## Annex III. Survey Instruments

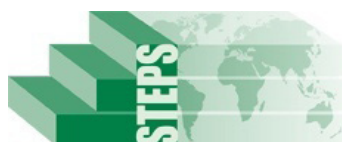

### WHO STEPS Instrument for Non Communicable Diseases Risk Factor Surveillance

Nepal

#### Survey information

| Licatuion and date |                                      | Response                      | Code |
|--------------------|--------------------------------------|-------------------------------|------|
| 1                  | Ward ID                              | _____                         | 11   |
| 2                  | Ward Number                          | _____                         | 12   |
| 3                  | Interviewer ID                       | _____                         | 13   |
| 4                  | Date of completion of the instrument | _____<br>dd      mm      year | 14   |

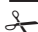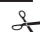

| Conset, interview language and name        |                                      | Response                             | Code |
|--------------------------------------------|--------------------------------------|--------------------------------------|------|
| Participant Id number _____                |                                      |                                      |      |
| 5                                          | Consent has been read and obtained   | Yes 1<br>No 2 <b>If NO, END</b>      | 15   |
| 6                                          | Interview language                   | English 1<br>Nepali 2                | 16   |
| 7                                          | Time of interview<br>(24 hour clock) | _____ : _____<br>hrs            mins | 17   |
| 8                                          | Family surname                       | _____                                | 18   |
| 9                                          | First name                           | _____                                | 19   |
| Additional information that may be helpful |                                      |                                      |      |
| 10                                         | Contact phone number where possible  | _____                                | 110  |

Record and file identification information (I5 to I10) separately from the completed questionnaire.

## STEP I. Demographic information

### Demographic information

| Question |                                                                                              | Response                                                                                                                                                                                                                                                                                                                                                                                                                                                                                                                                                                                                                                                                                                                                                                                                                                                                                                                                                                                                 | Code |
|----------|----------------------------------------------------------------------------------------------|----------------------------------------------------------------------------------------------------------------------------------------------------------------------------------------------------------------------------------------------------------------------------------------------------------------------------------------------------------------------------------------------------------------------------------------------------------------------------------------------------------------------------------------------------------------------------------------------------------------------------------------------------------------------------------------------------------------------------------------------------------------------------------------------------------------------------------------------------------------------------------------------------------------------------------------------------------------------------------------------------------|------|
| 11       | Sex ( <i>record male female as observed</i> )                                                | Male 1<br>Female 2                                                                                                                                                                                                                                                                                                                                                                                                                                                                                                                                                                                                                                                                                                                                                                                                                                                                                                                                                                                       | C1   |
| 12       | What is your date of birth?<br><br><i>Don't know 77 77 7777</i>                              | <div style="text-align: center;"> <span style="border-bottom: 1px solid black; width: 20px; display: inline-block;"></span> <span style="border-bottom: 1px solid black; width: 20px; display: inline-block;"></span> <span style="border-bottom: 1px solid black; width: 20px; display: inline-block;"></span> <span style="border-bottom: 1px solid black; width: 20px; display: inline-block;"></span> <span style="border-bottom: 1px solid black; width: 20px; display: inline-block;"></span> <span style="border-bottom: 1px solid black; width: 20px; display: inline-block;"></span> <span style="border-bottom: 1px solid black; width: 20px; display: inline-block;"></span> <span style="border-bottom: 1px solid black; width: 20px; display: inline-block;"></span> </div> <p style="text-align: center; margin-top: 5px;"><i>If known, Go to C4</i></p> <div style="display: flex; justify-content: space-around; width: 100%;"> <span>dd</span> <span>mm</span> <span>year</span> </div> | C2   |
| 13       | How old are you?                                                                             | Years <span style="border-bottom: 1px solid black; width: 20px; display: inline-block;"></span>                                                                                                                                                                                                                                                                                                                                                                                                                                                                                                                                                                                                                                                                                                                                                                                                                                                                                                          | C3   |
| 14       | In total, how many years have you spent in school or full-time study (excluding pre-school)? | Years <span style="border-bottom: 1px solid black; width: 20px; display: inline-block;"></span>                                                                                                                                                                                                                                                                                                                                                                                                                                                                                                                                                                                                                                                                                                                                                                                                                                                                                                          | C4   |
| 15       | What is the <b>highest level of education</b> you have completed?                            | No formal schooling 1<br><br>Less than primary school 2<br><br>Primary school completed 3<br><br>Secondary school completed 4<br><br>Higher secondary (10+2)/ PCL completed 5<br><br>Bachelor degree completed 6<br><br>Post graduate degree 7<br><br>Refused 88                                                                                                                                                                                                                                                                                                                                                                                                                                                                                                                                                                                                                                                                                                                                         | C5   |
| 16       | What is your <b>ethnic background</b> ?<br><br>(USE CASTE CLASSIFICATION CARD)               | Dalit 1<br><br>Disadvantaged Janajatis 2<br><br>Disadvantaged non-Dalit Terai caste groups 3<br><br>Religious minorities 4<br><br>Relatively advantaged Janajatis 5<br><br>Upper caste groups 6<br><br>Refused 88                                                                                                                                                                                                                                                                                                                                                                                                                                                                                                                                                                                                                                                                                                                                                                                        | C6   |

| Demographic information continued |                                                                                             |                                                                                                                                                                                                            |    |
|-----------------------------------|---------------------------------------------------------------------------------------------|------------------------------------------------------------------------------------------------------------------------------------------------------------------------------------------------------------|----|
| Question                          | Response                                                                                    | Code                                                                                                                                                                                                       |    |
| 17                                | What is your <b>marital status</b> ?                                                        | Never married 1<br>Currently married 2<br>Separated 3<br>Divorced 4<br>Widowed 5<br>Cohabiting 6<br>Refused 88                                                                                             | C7 |
| 18                                | Which of the following best describes your <b>main work</b> status over the past 12 months? | Government employee 1<br>Non-government employee 2<br>Self-employed 3<br>Non-paid 4<br>Student 5<br>Homemaker 6<br>Retired 7<br>Unemployed (able to work) 8<br>Unemployed (unable to work) 9<br>Refused 88 | C8 |
| 19                                | How many people older than 15 years, including yourself, live in your household?            | Number of people<br><input type="text"/>                                                                                                                                                                   | C9 |

## STEP I. Behavioural measurements

| <b>Tobacco use</b>                                          |                                                                                                                                                                                                                |                                                                                                                                                                                                                                                                                                                                                                                                                                                                                                                                                                                                                                                                                                                                                                                                                                                                                                                                                                                                                                                                                                                                                                                                                                                                                                                                                                                                                                                                                                                                                                                                                                                                             |                      |        |         |  |                         |                      |                      |          |                        |                      |                      |          |                       |                      |                      |          |                              |                      |                      |          |       |                      |                      |          |                         |                      |                      |                      |                                               |
|-------------------------------------------------------------|----------------------------------------------------------------------------------------------------------------------------------------------------------------------------------------------------------------|-----------------------------------------------------------------------------------------------------------------------------------------------------------------------------------------------------------------------------------------------------------------------------------------------------------------------------------------------------------------------------------------------------------------------------------------------------------------------------------------------------------------------------------------------------------------------------------------------------------------------------------------------------------------------------------------------------------------------------------------------------------------------------------------------------------------------------------------------------------------------------------------------------------------------------------------------------------------------------------------------------------------------------------------------------------------------------------------------------------------------------------------------------------------------------------------------------------------------------------------------------------------------------------------------------------------------------------------------------------------------------------------------------------------------------------------------------------------------------------------------------------------------------------------------------------------------------------------------------------------------------------------------------------------------------|----------------------|--------|---------|--|-------------------------|----------------------|----------------------|----------|------------------------|----------------------|----------------------|----------|-----------------------|----------------------|----------------------|----------|------------------------------|----------------------|----------------------|----------|-------|----------------------|----------------------|----------|-------------------------|----------------------|----------------------|----------------------|-----------------------------------------------|
| Now I am going to ask you some questions about tobacco use. |                                                                                                                                                                                                                |                                                                                                                                                                                                                                                                                                                                                                                                                                                                                                                                                                                                                                                                                                                                                                                                                                                                                                                                                                                                                                                                                                                                                                                                                                                                                                                                                                                                                                                                                                                                                                                                                                                                             |                      |        |         |  |                         |                      |                      |          |                        |                      |                      |          |                       |                      |                      |          |                              |                      |                      |          |       |                      |                      |          |                         |                      |                      |                      |                                               |
|                                                             | Question                                                                                                                                                                                                       | Response                                                                                                                                                                                                                                                                                                                                                                                                                                                                                                                                                                                                                                                                                                                                                                                                                                                                                                                                                                                                                                                                                                                                                                                                                                                                                                                                                                                                                                                                                                                                                                                                                                                                    | Code                 |        |         |  |                         |                      |                      |          |                        |                      |                      |          |                       |                      |                      |          |                              |                      |                      |          |       |                      |                      |          |                         |                      |                      |                      |                                               |
| 20                                                          | Do you <b>currently</b> smoke any <b>tobacco</b> products, such as cigarettes, cigars, pipes, bidis, hukahs or tamakhus?<br><br>(USE SHOWCARD)                                                                 | Yes 1<br><br>No 2 <i>If No, go to T8</i>                                                                                                                                                                                                                                                                                                                                                                                                                                                                                                                                                                                                                                                                                                                                                                                                                                                                                                                                                                                                                                                                                                                                                                                                                                                                                                                                                                                                                                                                                                                                                                                                                                    | T1                   |        |         |  |                         |                      |                      |          |                        |                      |                      |          |                       |                      |                      |          |                              |                      |                      |          |       |                      |                      |          |                         |                      |                      |                      |                                               |
| 21                                                          | Do you currently smoke tobacco products <b>daily</b> ?                                                                                                                                                         | Yes 1<br>No 2                                                                                                                                                                                                                                                                                                                                                                                                                                                                                                                                                                                                                                                                                                                                                                                                                                                                                                                                                                                                                                                                                                                                                                                                                                                                                                                                                                                                                                                                                                                                                                                                                                                               | T2                   |        |         |  |                         |                      |                      |          |                        |                      |                      |          |                       |                      |                      |          |                              |                      |                      |          |       |                      |                      |          |                         |                      |                      |                      |                                               |
| 22                                                          | How old were you when you <b>first started</b> smoking?                                                                                                                                                        | Age (years) <input type="text"/> <input type="text"/> <input type="text"/> <i>If known, go to T5a/T5aw</i><br>Don't know 77                                                                                                                                                                                                                                                                                                                                                                                                                                                                                                                                                                                                                                                                                                                                                                                                                                                                                                                                                                                                                                                                                                                                                                                                                                                                                                                                                                                                                                                                                                                                                 | T3                   |        |         |  |                         |                      |                      |          |                        |                      |                      |          |                       |                      |                      |          |                              |                      |                      |          |       |                      |                      |          |                         |                      |                      |                      |                                               |
| 23                                                          | Do you remember how long ago it was?(RECORD ONLY 1, NOT ALL 3)<br><br><i>Don't know 77</i>                                                                                                                     | In Years <input type="text"/> <input type="text"/> <input type="text"/> <i>If known, go to T5a/T5aw</i><br>OR in months <input type="text"/> <input type="text"/> <input type="text"/> <i>If known, go to T5a/T5aw</i><br>OR in weeks <input type="text"/> <input type="text"/> <input type="text"/>                                                                                                                                                                                                                                                                                                                                                                                                                                                                                                                                                                                                                                                                                                                                                                                                                                                                                                                                                                                                                                                                                                                                                                                                                                                                                                                                                                        | T4a<br>T4b<br>T4c    |        |         |  |                         |                      |                      |          |                        |                      |                      |          |                       |                      |                      |          |                              |                      |                      |          |       |                      |                      |          |                         |                      |                      |                      |                                               |
| 24                                                          | On average, <b>how many</b> of the following products do you smoke <b>each day/week</b> ?<br><br>(IF LESS THAN DAILY, RECORD WEEKLY)<br><br>(RECORD FOR EACH TYPE, USE SHOWCARD)<br><br><i>Don't know 7777</i> | <table style="width: 100%; border-collapse: collapse;"> <thead> <tr> <th style="width: 40%;"></th> <th style="width: 10%; text-align: center;">DAILY↓</th> <th style="width: 10%; text-align: center;">WEEKLY↓</th> <th style="width: 40%;"></th> </tr> </thead> <tbody> <tr> <td style="padding: 5px;">Manufactured cigarettes</td> <td style="text-align: center;"><input type="text"/></td> <td style="text-align: center;"><input type="text"/></td> <td style="padding: 5px;">T5a/T5aw</td> </tr> <tr> <td style="padding: 5px;">Hand-rolled cigarettes</td> <td style="text-align: center;"><input type="text"/></td> <td style="text-align: center;"><input type="text"/></td> <td style="padding: 5px;">T5b/T5bw</td> </tr> <tr> <td style="padding: 5px;">Pipes full of tobacco</td> <td style="text-align: center;"><input type="text"/></td> <td style="text-align: center;"><input type="text"/></td> <td style="padding: 5px;">T5c/T5cw</td> </tr> <tr> <td style="padding: 5px;">Cigars, cheroots, cigarillos</td> <td style="text-align: center;"><input type="text"/></td> <td style="text-align: center;"><input type="text"/></td> <td style="padding: 5px;">T5d/T5dw</td> </tr> <tr> <td style="padding: 5px;">Other</td> <td style="text-align: center;"><input type="text"/></td> <td style="text-align: center;"><input type="text"/></td> <td style="padding: 5px;">T5e/T5ew</td> </tr> <tr> <td style="padding: 5px;">Other (please specify):</td> <td style="text-align: center;"><input type="text"/></td> <td style="text-align: center;"><input type="text"/></td> <td style="padding: 5px;">T5other/<br/>T5otherw</td> </tr> </tbody> </table> |                      | DAILY↓ | WEEKLY↓ |  | Manufactured cigarettes | <input type="text"/> | <input type="text"/> | T5a/T5aw | Hand-rolled cigarettes | <input type="text"/> | <input type="text"/> | T5b/T5bw | Pipes full of tobacco | <input type="text"/> | <input type="text"/> | T5c/T5cw | Cigars, cheroots, cigarillos | <input type="text"/> | <input type="text"/> | T5d/T5dw | Other | <input type="text"/> | <input type="text"/> | T5e/T5ew | Other (please specify): | <input type="text"/> | <input type="text"/> | T5other/<br>T5otherw | <i>If other, go to T5other, else go to T6</i> |
|                                                             | DAILY↓                                                                                                                                                                                                         | WEEKLY↓                                                                                                                                                                                                                                                                                                                                                                                                                                                                                                                                                                                                                                                                                                                                                                                                                                                                                                                                                                                                                                                                                                                                                                                                                                                                                                                                                                                                                                                                                                                                                                                                                                                                     |                      |        |         |  |                         |                      |                      |          |                        |                      |                      |          |                       |                      |                      |          |                              |                      |                      |          |       |                      |                      |          |                         |                      |                      |                      |                                               |
| Manufactured cigarettes                                     | <input type="text"/>                                                                                                                                                                                           | <input type="text"/>                                                                                                                                                                                                                                                                                                                                                                                                                                                                                                                                                                                                                                                                                                                                                                                                                                                                                                                                                                                                                                                                                                                                                                                                                                                                                                                                                                                                                                                                                                                                                                                                                                                        | T5a/T5aw             |        |         |  |                         |                      |                      |          |                        |                      |                      |          |                       |                      |                      |          |                              |                      |                      |          |       |                      |                      |          |                         |                      |                      |                      |                                               |
| Hand-rolled cigarettes                                      | <input type="text"/>                                                                                                                                                                                           | <input type="text"/>                                                                                                                                                                                                                                                                                                                                                                                                                                                                                                                                                                                                                                                                                                                                                                                                                                                                                                                                                                                                                                                                                                                                                                                                                                                                                                                                                                                                                                                                                                                                                                                                                                                        | T5b/T5bw             |        |         |  |                         |                      |                      |          |                        |                      |                      |          |                       |                      |                      |          |                              |                      |                      |          |       |                      |                      |          |                         |                      |                      |                      |                                               |
| Pipes full of tobacco                                       | <input type="text"/>                                                                                                                                                                                           | <input type="text"/>                                                                                                                                                                                                                                                                                                                                                                                                                                                                                                                                                                                                                                                                                                                                                                                                                                                                                                                                                                                                                                                                                                                                                                                                                                                                                                                                                                                                                                                                                                                                                                                                                                                        | T5c/T5cw             |        |         |  |                         |                      |                      |          |                        |                      |                      |          |                       |                      |                      |          |                              |                      |                      |          |       |                      |                      |          |                         |                      |                      |                      |                                               |
| Cigars, cheroots, cigarillos                                | <input type="text"/>                                                                                                                                                                                           | <input type="text"/>                                                                                                                                                                                                                                                                                                                                                                                                                                                                                                                                                                                                                                                                                                                                                                                                                                                                                                                                                                                                                                                                                                                                                                                                                                                                                                                                                                                                                                                                                                                                                                                                                                                        | T5d/T5dw             |        |         |  |                         |                      |                      |          |                        |                      |                      |          |                       |                      |                      |          |                              |                      |                      |          |       |                      |                      |          |                         |                      |                      |                      |                                               |
| Other                                                       | <input type="text"/>                                                                                                                                                                                           | <input type="text"/>                                                                                                                                                                                                                                                                                                                                                                                                                                                                                                                                                                                                                                                                                                                                                                                                                                                                                                                                                                                                                                                                                                                                                                                                                                                                                                                                                                                                                                                                                                                                                                                                                                                        | T5e/T5ew             |        |         |  |                         |                      |                      |          |                        |                      |                      |          |                       |                      |                      |          |                              |                      |                      |          |       |                      |                      |          |                         |                      |                      |                      |                                               |
| Other (please specify):                                     | <input type="text"/>                                                                                                                                                                                           | <input type="text"/>                                                                                                                                                                                                                                                                                                                                                                                                                                                                                                                                                                                                                                                                                                                                                                                                                                                                                                                                                                                                                                                                                                                                                                                                                                                                                                                                                                                                                                                                                                                                                                                                                                                        | T5other/<br>T5otherw |        |         |  |                         |                      |                      |          |                        |                      |                      |          |                       |                      |                      |          |                              |                      |                      |          |       |                      |                      |          |                         |                      |                      |                      |                                               |
| 25                                                          | During the past 12 months, have you tried to <b>stop smoking</b> ?                                                                                                                                             | Yes 1<br>No 2                                                                                                                                                                                                                                                                                                                                                                                                                                                                                                                                                                                                                                                                                                                                                                                                                                                                                                                                                                                                                                                                                                                                                                                                                                                                                                                                                                                                                                                                                                                                                                                                                                                               | T6                   |        |         |  |                         |                      |                      |          |                        |                      |                      |          |                       |                      |                      |          |                              |                      |                      |          |       |                      |                      |          |                         |                      |                      |                      |                                               |
| 26                                                          | During any visit to a doctor or other health worker in the past 12 months, were you advised to quit smoking tobacco?                                                                                           | Yes 1 <i>If T2=Yes, go to T12; if T2=No, go to T9</i><br>No 2 <i>If T2=Yes, go to T12; if T2=No, go to T9</i><br>No visit during the past 12 months 3 <i>If T2=Yes, go to T12; if T2=No, go to T9</i>                                                                                                                                                                                                                                                                                                                                                                                                                                                                                                                                                                                                                                                                                                                                                                                                                                                                                                                                                                                                                                                                                                                                                                                                                                                                                                                                                                                                                                                                       | T7                   |        |         |  |                         |                      |                      |          |                        |                      |                      |          |                       |                      |                      |          |                              |                      |                      |          |       |                      |                      |          |                         |                      |                      |                      |                                               |
| 27                                                          | In the past, did you <b>ever smoke</b> any tobacco products? (USE SHOWCARD)                                                                                                                                    | Yes 1<br>No 2 <i>If No, go to T12</i>                                                                                                                                                                                                                                                                                                                                                                                                                                                                                                                                                                                                                                                                                                                                                                                                                                                                                                                                                                                                                                                                                                                                                                                                                                                                                                                                                                                                                                                                                                                                                                                                                                       | T8                   |        |         |  |                         |                      |                      |          |                        |                      |                      |          |                       |                      |                      |          |                              |                      |                      |          |       |                      |                      |          |                         |                      |                      |                      |                                               |
| 28                                                          | In the past, did you <b>ever smoke daily</b> ?                                                                                                                                                                 | Yes 1 <i>If T1=Yes, go to T12, else go to T10</i><br>No 2 <i>If T1=Yes, go to T12, else go to T10</i>                                                                                                                                                                                                                                                                                                                                                                                                                                                                                                                                                                                                                                                                                                                                                                                                                                                                                                                                                                                                                                                                                                                                                                                                                                                                                                                                                                                                                                                                                                                                                                       | T9                   |        |         |  |                         |                      |                      |          |                        |                      |                      |          |                       |                      |                      |          |                              |                      |                      |          |       |                      |                      |          |                         |                      |                      |                      |                                               |

| Tobacco use continued |                                                                                                                                                                                                 |                                                                                                                                                                                                                                   |                                                                                                                                                                         |             |
|-----------------------|-------------------------------------------------------------------------------------------------------------------------------------------------------------------------------------------------|-----------------------------------------------------------------------------------------------------------------------------------------------------------------------------------------------------------------------------------|-------------------------------------------------------------------------------------------------------------------------------------------------------------------------|-------------|
| Question              | Response                                                                                                                                                                                        |                                                                                                                                                                                                                                   | Code                                                                                                                                                                    |             |
| 29                    | How old were you when you <b>stopped</b> smoking?                                                                                                                                               | Age (years) <input type="text"/> <input type="text"/> <i>If known, go to T12</i><br>Don't know 77                                                                                                                                 | T10                                                                                                                                                                     |             |
| 30                    | How <b>long ago</b> did you stop smoking?<br><br>(RECORD ONLY 1, NOT ALL 3)<br><br><i>Don't know 77</i>                                                                                         | Years ago <input type="text"/> <input type="text"/> <i>If known, go to T12</i>                                                                                                                                                    | T11a                                                                                                                                                                    |             |
|                       |                                                                                                                                                                                                 | OR Months ago <input type="text"/> <input type="text"/> <i>If known, go to T12</i>                                                                                                                                                | T11b                                                                                                                                                                    |             |
|                       |                                                                                                                                                                                                 | OR Weeks ago <input type="text"/> <input type="text"/>                                                                                                                                                                            | T11c                                                                                                                                                                    |             |
| 31                    | Do you <b>currently use</b> any <b>smokeless tobacco</b> products such as [ <i>snuff, chewing tobacco, nasal snuff, khaini, surti, gutka</i> ]? (USE SHOWCARD)                                  | Yes 1<br>No 2 <i>If no, go to T15</i>                                                                                                                                                                                             | T12                                                                                                                                                                     |             |
| 32                    | Do you <b>currently use smokeless tobacco</b> products <b>daily</b> ?                                                                                                                           | Yes 1<br>No 2 <i>If no, go to T14aw</i>                                                                                                                                                                                           | T13                                                                                                                                                                     |             |
| 33                    | On average, how many <b>times a day/week</b> do you use ....<br><br>(IF LESS THAN DAILY, RECORD WEEKLY)<br><br>(RECORD FOR EACH TYPE, USE SHOWCARD)<br><br><i>Don't know 7777</i>               | DAILY↓      WEEKLY↓                                                                                                                                                                                                               |                                                                                                                                                                         |             |
|                       |                                                                                                                                                                                                 | Snuff, by mouth <input type="text"/> | <input type="text"/> | T14a/T14aw  |
|                       |                                                                                                                                                                                                 | Snuff, by nose <input type="text"/>                                            | <input type="text"/> | T14b/T14bw  |
|                       |                                                                                                                                                                                                 | Chewing tobacco <input type="text"/>                                           | <input type="text"/> | T14c/T14cw  |
|                       |                                                                                                                                                                                                 | Betel <input type="text"/>                                                     | <input type="text"/> | T14d/ T14dw |
|                       | Other <input type="text"/>                   | <input type="text"/>                                                           | T14e/T14ew                                                                                                                                                              |             |
|                       | Other (please specify): <input type="text"/> | <i>If other, go to T14other, if T13=No, go to T16, else go to T17</i><br><i>If T13=No, go to T16, else go to T17</i>                                                                                                              | T14other/<br>T14 otherw                                                                                                                                                 |             |
| 34                    | In the <b>past</b> , did you <b>ever use</b> smokeless tobacco products such as [ <i>snuff, chewing tobacco, nasal snuff, khaini, surti, gutka</i> ]?                                           | Yes 1<br>No 2 <i>If no, go to T17</i>                                                                                                                                                                                             | T15                                                                                                                                                                     |             |
| 35                    | In the <b>past</b> , did you <b>ever use</b> smokeless tobacco products such as [ <i>snuff, chewing tobacco, nasal snuff, khaini, surti, gutka</i> ] <b>daily</b> ?                             | Yes 1<br>No 2                                                                                                                                                                                                                     | T16                                                                                                                                                                     |             |
| 36                    | During the past 7 days, on how many days did someone <b>in your home</b> smoke when you were present?                                                                                           | Number of days <input type="text"/> <input type="text"/> <input type="text"/><br>Don't know 77                                                                                                                                    | T17                                                                                                                                                                     |             |
| 37                    | During the past 7 days, on how many days did someone smoke in closed areas <b>in your workplace</b> (in the building, in a work area or a specific office) when you were present?               | Number of days <input type="text"/> <input type="text"/> <input type="text"/><br>Don't know or don't work in a closed area 77                                                                                                     | T18                                                                                                                                                                     |             |

| Alcohol consumption                                      |                                                                                                                                                                             |                                                                                                                                                                                                                               |                                               |
|----------------------------------------------------------|-----------------------------------------------------------------------------------------------------------------------------------------------------------------------------|-------------------------------------------------------------------------------------------------------------------------------------------------------------------------------------------------------------------------------|-----------------------------------------------|
| The next questions ask about the consumption of alcohol. |                                                                                                                                                                             |                                                                                                                                                                                                                               |                                               |
| Question                                                 | Response                                                                                                                                                                    | Code                                                                                                                                                                                                                          |                                               |
| 38                                                       | Have you <b>ever</b> consumed an alcoholic drink such as beer, wine, spirits, fermented cider or <i>ljaad, raksi, tungba</i> ? (USE SHOWCARD)                               | Yes 1<br>No 2 <i>If no, go to D1</i>                                                                                                                                                                                          | A1a                                           |
| 39                                                       | Have you consumed an alcoholic drink within the <b>past 12 months</b> ?                                                                                                     | Yes 1<br>No 2 <i>If no, go to D1</i>                                                                                                                                                                                          | A1b                                           |
| 40                                                       | During the past 12 months, <b>how frequently</b> have you had at least one alcoholic drink?<br>(READ RESPONSES, USE SHOWCARD)                                               | Daily 1<br>5–6 days per week 2<br>1–4 days per week 3<br>1–3 days per month 4<br>Less than once a month 5                                                                                                                     | A2                                            |
| 41                                                       | Have you consumed an alcoholic drink within the <b>past 30 days</b> ?                                                                                                       | Yes 1<br>No 2 <i>If no, go to D1</i>                                                                                                                                                                                          | A3                                            |
| 42                                                       | During the past 30 days, on how many <b>occasions</b> did you have at least one alcoholic drink?                                                                            | Number <input type="text"/><br>Don't know 77                                                                                                                                                                                  | A4                                            |
| 43                                                       | During the past 30 days, when you drank alcohol, <b>on average</b> , how many <b>standard alcoholic drinks</b> did you have during one drinking occasion?<br>(USE SHOWCARD) | Number <input type="text"/><br>Don't know 77                                                                                                                                                                                  | A5                                            |
| 44                                                       | During the past 30 days, what was the <b>largest number</b> of standard alcoholic drinks you had on a single occasion, counting all types of alcoholic drinks together?     | Largest number <input type="text"/><br>Don't Know 77                                                                                                                                                                          | A6                                            |
| 45                                                       | During the past 30 days, how many times did you have for <b>men: five or more</b> for <b>women: four or more</b> standard alcoholic drinks in a single drinking occasion?   | Number of times <input type="text"/><br>Don't know 77                                                                                                                                                                         | A7                                            |
| 46                                                       | During the past 30 days, when you consumed an alcoholic drink, how often was it with meals? Please do not count snacks.                                                     | Usually with meals 1<br>Sometimes with meals 2<br>Rarely with meals 3<br>Never with meals 4                                                                                                                                   | A8                                            |
| 47                                                       | During each of the <b>past 7 days</b> , how many standard alcoholic drinks did you have each day?<br>(USE SHOWCARD)<br><br><i>Don't know 77</i>                             | Monday <input type="text"/><br>Tuesday <input type="text"/><br>Wednesday <input type="text"/><br>Thursday <input type="text"/><br>Friday <input type="text"/><br>Saturday <input type="text"/><br>Sunday <input type="text"/> | A9a<br>A9b<br>A9c<br>A9d<br>A9e<br>A9f<br>A9g |

| Diet                                                                                                                                                                                                                                                                                               |                                                                                                                                                                                                                                                                                                                                                                                                                                                                                                                                                                                   |  |                                               |
|----------------------------------------------------------------------------------------------------------------------------------------------------------------------------------------------------------------------------------------------------------------------------------------------------|-----------------------------------------------------------------------------------------------------------------------------------------------------------------------------------------------------------------------------------------------------------------------------------------------------------------------------------------------------------------------------------------------------------------------------------------------------------------------------------------------------------------------------------------------------------------------------------|--|-----------------------------------------------|
| The next questions ask about the fruit and vegetables that you usually eat. I have a nutrition card here that shows you some examples of local fruit and vegetables. Each picture represents the size of a serving. As you answer these questions please think of a typical week in the last year. |                                                                                                                                                                                                                                                                                                                                                                                                                                                                                                                                                                                   |  |                                               |
| Question                                                                                                                                                                                                                                                                                           | Response                                                                                                                                                                                                                                                                                                                                                                                                                                                                                                                                                                          |  | Code                                          |
| 48<br>In a typical week, on how many days do you <b>eat fruit</b> ?<br><i>(USE SHOWCARD)</i>                                                                                                                                                                                                       | Number of days <input type="text"/> <input type="text"/> <input type="text"/> If Zero days, go to D3<br>Don't know 77                                                                                                                                                                                                                                                                                                                                                                                                                                                             |  | D1                                            |
| 49<br>How many <b>servings</b> of fruit do you eat on <b>one</b> of those days? <i>(USE SHOWCARD)</i>                                                                                                                                                                                              | Number of servings <input type="text"/> <input type="text"/> <input type="text"/> <input type="text"/><br>Don't know 77                                                                                                                                                                                                                                                                                                                                                                                                                                                           |  | D2                                            |
| 50<br>In a typical week, on how many days do you <b>eat vegetables</b> ? <i>(USE SHOWCARD)</i>                                                                                                                                                                                                     | Number of days <input type="text"/> <input type="text"/> <input type="text"/> If Zero days, go to D5<br>Don't know 77                                                                                                                                                                                                                                                                                                                                                                                                                                                             |  | D3                                            |
| 51<br>How many <b>servings</b> of vegetables do you eat on one of those days? <i>(USE SHOWCARD)</i>                                                                                                                                                                                                | Number of servings <input type="text"/> <input type="text"/> <input type="text"/><br>Don't know 77                                                                                                                                                                                                                                                                                                                                                                                                                                                                                |  | D4                                            |
| 52<br>What type of oil or fat is most often used for meal preparation in your household?<br><i>(USE SHOWCARD)</i><br><i>(SELECT ONLY ONE)</i>                                                                                                                                                      | Mustard oil 1<br>Refined vegetable oil 2<br>Lard or suet 3<br>Butter or ghee 4<br>Noodles oil 5<br>Other 6 If other, go to D5 other<br>None in particular 7<br>None used 8<br>Don't know 77<br>Other (Please Specify) .....                                                                                                                                                                                                                                                                                                                                                       |  | D5<br>D5 other                                |
| 53<br>On average, how many meals per week do you eat that were not prepared at a home? By meal, I mean breakfast, lunch and dinner.                                                                                                                                                                | Number <input type="text"/> <input type="text"/> <input type="text"/><br>Don't know 77                                                                                                                                                                                                                                                                                                                                                                                                                                                                                            |  | D6                                            |
| 54<br>How much of the oil/ghee identified in D5 does your household consume?(Fill only one option)<br>1 deuja (1 chauthai) = 125ml; 5 muthi = 250ml,<br>1 mana = 500ml 1 litre = 1000 ml                                                                                                           | millilitres in a day <input type="text"/> <input type="text"/> <input type="text"/> <input type="text"/> <input type="text"/><br>millilitres in a week <input type="text"/> <input type="text"/> <input type="text"/> <input type="text"/> <input type="text"/> <input type="text"/><br>millilitres in a month <input type="text"/> <input type="text"/> <input type="text"/> <input type="text"/> <input type="text"/><br>Don't Know 77                                                                                                                                          |  | X1                                            |
| 55<br>How many people of following age groups live in your household?<br><i>(Record for all the options applicable)</i>                                                                                                                                                                            | Less than 3 years <input type="text"/> <input type="text"/> <input type="text"/><br>3 to 5 year <input type="text"/> <input type="text"/> <input type="text"/><br>5 to 7 year <input type="text"/> <input type="text"/> <input type="text"/><br>7 to 9 years <input type="text"/> <input type="text"/> <input type="text"/><br>9 to 12 years <input type="text"/> <input type="text"/> <input type="text"/><br>12 to 21 years <input type="text"/> <input type="text"/> <input type="text"/><br>More than 21 years <input type="text"/> <input type="text"/> <input type="text"/> |  | X2a<br>X2b<br>X2c<br>X2d<br>X2e<br>X2f<br>X2g |

| Dietary salt                                                                                                                                                                                                                                                                                                                                                                                                                                                                                                                                                                                                                                                                                                                                           |                                                                                                                                                                                                                                                                                                     |                                                                                                                                         |      |
|--------------------------------------------------------------------------------------------------------------------------------------------------------------------------------------------------------------------------------------------------------------------------------------------------------------------------------------------------------------------------------------------------------------------------------------------------------------------------------------------------------------------------------------------------------------------------------------------------------------------------------------------------------------------------------------------------------------------------------------------------------|-----------------------------------------------------------------------------------------------------------------------------------------------------------------------------------------------------------------------------------------------------------------------------------------------------|-----------------------------------------------------------------------------------------------------------------------------------------|------|
| <p>The next questions ask about your knowledge, attitudes and behaviour towards dietary salt. Dietary salt includes ordinary table salt, unrefined salt such as sea salt, iodised salt and salty sauces such as soya sauce or fish sauce. The following questions are on adding salt to food right before you eat it, how food is prepared in your home, eating processed foods that are high in salt such as <i>chau chau</i>, <i>Lays chips</i>, <i>Kurkure</i>, <i>salty biscuits</i>, <i>canned fish</i>, <i>dry meat</i>, <i>titura</i>, <i>preserved pickle</i>, <i>bhujia</i>, <i>mixtures</i>, <i>papad</i> etc. and on controlling your salt intake. Please answer the questions even if you consider yourself to eat a diet low in salt.</p> |                                                                                                                                                                                                                                                                                                     |                                                                                                                                         |      |
| Question                                                                                                                                                                                                                                                                                                                                                                                                                                                                                                                                                                                                                                                                                                                                               |                                                                                                                                                                                                                                                                                                     | Response                                                                                                                                | Code |
| 56                                                                                                                                                                                                                                                                                                                                                                                                                                                                                                                                                                                                                                                                                                                                                     | <p>How often do you <b>add salt</b> to your food before you eat it or as you are eating it?</p> <p>(SELECT ONLY ONE)</p>                                                                                                                                                                            | <p>Always 1</p> <p>Often 2</p> <p>Sometimes 3</p> <p>Rarely 4</p> <p>Never 5</p> <p>Don't know 77</p>                                   | DS1  |
| 57                                                                                                                                                                                                                                                                                                                                                                                                                                                                                                                                                                                                                                                                                                                                                     | <p>How often is <b>salt added</b> in cooking or preparing foods in your household?</p>                                                                                                                                                                                                              | <p>Always 1</p> <p>Often 2</p> <p>Sometimes 3</p> <p>Rarely 4</p> <p>Never 5</p> <p>Don't know 77</p>                                   | DS2  |
| 58                                                                                                                                                                                                                                                                                                                                                                                                                                                                                                                                                                                                                                                                                                                                                     | <p>How often do you eat <b>processed food high in salt</b>, such as <i>chau chau</i>, <i>Lays</i>, <i>Kurkure</i>, <i>salty biscuits</i>, <i>canned fish</i>, <i>dry meat</i>, <i>titura</i>, <i>preserved pickle</i>, <i>bhujia</i>, <i>mixtures</i>, <i>papad</i> etc.?</p> <p>(USE SHOWCARD)</p> | <p>Always 1</p> <p>Often 2</p> <p>Sometimes 3</p> <p>Rarely 4</p> <p>Never 5</p> <p>Don't know 77</p>                                   | DS3  |
| 59                                                                                                                                                                                                                                                                                                                                                                                                                                                                                                                                                                                                                                                                                                                                                     | <p><b>How much salt</b> do you think you consume?</p>                                                                                                                                                                                                                                               | <p>Far too much 1</p> <p>Too much 2</p> <p>Just the right amount 3</p> <p>Too little 4</p> <p>Far too little 5</p> <p>Don't know 77</p> | DS4  |
| 60                                                                                                                                                                                                                                                                                                                                                                                                                                                                                                                                                                                                                                                                                                                                                     | <p>Do you think that too much salt in your diet could cause a serious <b>health problem</b>?</p>                                                                                                                                                                                                    | <p>Yes 1</p> <p>No 2</p> <p>Don't know 77</p>                                                                                           | DS5  |
| 61                                                                                                                                                                                                                                                                                                                                                                                                                                                                                                                                                                                                                                                                                                                                                     | <p>How important to you is <b>lowering the salt</b> in your diet?</p>                                                                                                                                                                                                                               | <p>Very important 1</p> <p>Somewhat important 2</p> <p>Not at all important 3</p> <p>Don't know 77</p>                                  | DS6  |



| Dietary salt continued |                                                                                                            |                                                                                                                                                                                                                                                                                        |                |
|------------------------|------------------------------------------------------------------------------------------------------------|----------------------------------------------------------------------------------------------------------------------------------------------------------------------------------------------------------------------------------------------------------------------------------------|----------------|
| Question               | Response                                                                                                   | Code                                                                                                                                                                                                                                                                                   |                |
| 62                     | Do you do any of the following on a regular basis to <b>control your salt intake?</b><br>(RECORD FOR EACH) |                                                                                                                                                                                                                                                                                        |                |
|                        | Avoid/minimise consumption of processed foods                                                              | Yes 1<br>No 2                                                                                                                                                                                                                                                                          | DS7a           |
|                        | Look at the salt or sodium labels on food                                                                  | Yes 1<br>No 2                                                                                                                                                                                                                                                                          | DS7b           |
|                        | Eat meals without adding salt at the table                                                                 | Yes 1<br>No 2                                                                                                                                                                                                                                                                          | DS7c           |
|                        | Buy low salt/sodium alternatives                                                                           | Yes 1<br>No 2                                                                                                                                                                                                                                                                          | DS7d           |
|                        | Cook meals without adding salt                                                                             | Yes 1<br>No 2                                                                                                                                                                                                                                                                          | DS7e           |
|                        | Use spices other than salt when cooking                                                                    | Yes 1<br>No 2                                                                                                                                                                                                                                                                          | DS7f           |
|                        | Avoid eating out                                                                                           | Yes 1<br>No 2                                                                                                                                                                                                                                                                          | DS7g           |
|                        | Other                                                                                                      | Yes 1 <i>If Yes, go to DS7other</i><br>No 2                                                                                                                                                                                                                                            | DS7h           |
|                        | Other (please specify)                                                                                     | <input type="checkbox"/>                                                                                | DS7other       |
| 63                     | Which type of salt do you use?                                                                             | Crystal Salt 1<br>Powdered Salt without logo 2<br>Powdered salt with two children logo 3<br>Others 4 (If others go to X3 other<br>Others (Please Specify) <input type="checkbox"/> <input type="checkbox"/> <input type="checkbox"/> <input type="checkbox"/> <input type="checkbox"/> | X3<br>X3 Other |
|                        |                                                                                                            |                                                                                                                                                                                                                                                                                        |                |
| 64                     | How much salt does your family consume?(Fill only one option)                                              | milligrams in a day <input type="checkbox"/> <input type="checkbox"/> <input type="checkbox"/> <input type="checkbox"/> <input type="checkbox"/>                                                                                                                                       | X4             |
|                        | 1 pathi crystal salt = 3,000 mg                                                                            | milligrams in a week <input type="checkbox"/> <input type="checkbox"/> <input type="checkbox"/> <input type="checkbox"/> <input type="checkbox"/>                                                                                                                                      |                |
|                        | 1 mana crystal salt = 375 mg                                                                               | milligrams in a month <input type="checkbox"/> <input type="checkbox"/> <input type="checkbox"/> <input type="checkbox"/> <input type="checkbox"/>                                                                                                                                     |                |
|                        | 1packet powdered salt = 1,000 mg                                                                           | Don't know 77                                                                                                                                                                                                                                                                          |                |

| Oral health                                                                  |                                                                                          |                                                                                                                                                                                                               |      |
|------------------------------------------------------------------------------|------------------------------------------------------------------------------------------|---------------------------------------------------------------------------------------------------------------------------------------------------------------------------------------------------------------|------|
| The next questions ask about your oral health status and related behaviours. |                                                                                          |                                                                                                                                                                                                               |      |
| Question                                                                     |                                                                                          | Response                                                                                                                                                                                                      | Code |
| 65                                                                           | How many <b>natural teeth</b> do you have?                                               | No natural teeth 1 <i>If no natural teeth, go to O4</i><br>1 to 9 teeth 2<br>10 to 19 teeth 3<br>20 teeth or more 4<br>Don't know 77                                                                          | O1   |
| 66                                                                           | How would you describe the <b>state of your teeth</b> ?                                  | Excellent 1<br>Very good 2<br>Good 3<br>Average 4<br>Poor 5<br>Very poor 6<br>Don't know 77                                                                                                                   | O2   |
| 67                                                                           | How would you describe the <b>state of your gums</b> ?                                   | Excellent 1<br>Very good 2<br>Good 3<br>Average 4<br>Poor 5<br>Very poor 6<br>Don't know 77                                                                                                                   | O3   |
| 68                                                                           | Do you have any <b>removable dentures</b> ?                                              | Yes 1<br>No 2 <i>If no, go to O6</i>                                                                                                                                                                          | O4   |
| Which of the following removable dentures do you have?<br>(RECORD FOR EACH)  |                                                                                          |                                                                                                                                                                                                               |      |
| 69                                                                           | An upper jaw denture                                                                     | Yes 1<br>No 2                                                                                                                                                                                                 | O5a  |
|                                                                              | A lower jaw denture                                                                      | Yes 1<br>No 2                                                                                                                                                                                                 | O5b  |
| 70                                                                           | During the past 12 months, did your teeth or mouth cause any <b>pain or discomfort</b> ? | Yes 1<br>No 2                                                                                                                                                                                                 | O6   |
| 71                                                                           | How long has it been since you last <b>saw a dentist</b> ?                               | Less than 6 months 1<br>6–12 months 2<br>More than 1 year, but less than 2 years 3<br>2 or more years, but less than 5 years 4<br>5 or more years 5<br>Never received dental care 6 <i>If never, go to O9</i> | O7   |

|    |                                                                     |                                                                                                                                                                                                                                    |    |
|----|---------------------------------------------------------------------|------------------------------------------------------------------------------------------------------------------------------------------------------------------------------------------------------------------------------------|----|
| 72 | What was the <b>main reason for your last visit</b> to the dentist? | Consultation/advice 1<br>Pain or trouble with teeth, gums or mouth 2<br>Treatment / Follow-up treatment 3<br>Routine check-up treatment 4<br>Other 5 <i>If other, go to O8other</i><br>Other (please specify) <input type="text"/> | O8 |
| 73 | How <b>often do you clean</b> your teeth?                           | Never 1 <i>If Never, go to O13a</i><br>Once a month 2<br>2–3 times a month 3<br>Once a week 4<br>2–6 times a week 5<br>Once a day 6<br>Twice or more a day 7                                                                       | O9 |

| Oral health continued                              |                                                                                          |                                                                                                                                                                                                                                                           |           |
|----------------------------------------------------|------------------------------------------------------------------------------------------|-----------------------------------------------------------------------------------------------------------------------------------------------------------------------------------------------------------------------------------------------------------|-----------|
| Question                                           |                                                                                          | Response                                                                                                                                                                                                                                                  | Code      |
| 74                                                 | Do you use <b>toothpaste</b> to clean your teeth?                                        | Yes 1                                                                                                                                                                                                                                                     | O10       |
|                                                    |                                                                                          | No 2 <i>If no, go to O12a</i>                                                                                                                                                                                                                             |           |
| 75                                                 | Do you use <b>toothpaste</b> containing <b>fluoride</b> ?                                | Yes 1                                                                                                                                                                                                                                                     | O11       |
|                                                    |                                                                                          | No 2                                                                                                                                                                                                                                                      |           |
|                                                    |                                                                                          | Don't know 77                                                                                                                                                                                                                                             |           |
| 76                                                 | Do you use any of the following to <b>clean your teeth</b> ?<br><i>(RECORD FOR EACH)</i> |                                                                                                                                                                                                                                                           |           |
|                                                    | Toothbrush                                                                               | Yes 1<br>No 2                                                                                                                                                                                                                                             | O12a      |
|                                                    | Wooden toothpick                                                                         | Yes 1<br>No 2                                                                                                                                                                                                                                             | O12b      |
|                                                    | Plastic toothpick                                                                        | Yes 1<br>No 2                                                                                                                                                                                                                                             | O12c      |
|                                                    | Thread (dental floss)                                                                    | Yes 1<br>No 2                                                                                                                                                                                                                                             | O12d      |
|                                                    | Charcoal                                                                                 | Yes 1<br>No 2                                                                                                                                                                                                                                             | O12e      |
|                                                    | Chewstick/miswak                                                                         | Yes 1<br>No 2                                                                                                                                                                                                                                             | O12f      |
|                                                    | Other                                                                                    | Yes 1 <i>If Yes, go to O12other</i><br>No 2                                                                                                                                                                                                               | O12g      |
|                                                    | Other (please specify)                                                                   | <input type="checkbox"/> | O12 other |
|                                                    | 77                                                                                       | Have you <b>experienced any of the following problems</b> during the past 12 months because of the <b>state of your teeth</b> ? (RECORD FOR EACH)                                                                                                         |           |
| Difficulty in chewing foods                        |                                                                                          | Yes 1<br>No 2                                                                                                                                                                                                                                             | O13a      |
| Difficulty with speech/trouble pronouncing words   |                                                                                          | Yes 1<br>No 2                                                                                                                                                                                                                                             | O13b      |
| Felt tense because of problems with teeth or mouth |                                                                                          | Yes 1<br>No 2                                                                                                                                                                                                                                             | O13c      |
| Embarrassed about appearance of teeth              |                                                                                          | Yes 1<br>No 2                                                                                                                                                                                                                                             | O13d      |

|    |                                                 |               |      |
|----|-------------------------------------------------|---------------|------|
|    | Avoided smiling because of teeth                | Yes 1<br>No 2 | O13e |
|    | Sleep is often interrupted                      | Yes 1<br>No 2 | O13f |
|    | Days not at work because of teeth or mouth      | Yes 1<br>No 2 | O13g |
|    | Difficulty doing usual activities               | Yes 1<br>No 2 | O13h |
|    | Less tolerant of spouse or people close to you  | Yes 1<br>No 2 | O13i |
|    | Reduced participation in social activities      | Yes 1<br>No 2 | O13j |
| 78 | Are you currently suffering from dental caries? | Yes 1<br>No 2 | O14  |

| Physical activity                                                                                                                                                                                                                                                                                                                                                                                                                                                                                                                                                                                                                                                                                                                                                                                                                                |                                                                                                                                                                                                                                                                                                                                                           |             |
|--------------------------------------------------------------------------------------------------------------------------------------------------------------------------------------------------------------------------------------------------------------------------------------------------------------------------------------------------------------------------------------------------------------------------------------------------------------------------------------------------------------------------------------------------------------------------------------------------------------------------------------------------------------------------------------------------------------------------------------------------------------------------------------------------------------------------------------------------|-----------------------------------------------------------------------------------------------------------------------------------------------------------------------------------------------------------------------------------------------------------------------------------------------------------------------------------------------------------|-------------|
| <p>Next I am going to ask you about the time you spend doing different types of physical activity in a typical week. Please answer these questions even if you do not consider yourself to be a physically active person. Think first about the time you spend doing work. Think of work as the things that you have to do such as paid or unpaid work, study or training, household chores, harvesting food and crops, fishing or hunting for food, seeking employment, walking uphill or downhill for routine work. In answering the following questions 'vigorous-intensity activities' are activities that require hard physical effort and cause large increases in breathing or heart rate, 'moderate-intensity activities' are activities that require moderate physical effort and cause small increases in breathing or heart rate.</p> |                                                                                                                                                                                                                                                                                                                                                           |             |
| Question                                                                                                                                                                                                                                                                                                                                                                                                                                                                                                                                                                                                                                                                                                                                                                                                                                         | Response                                                                                                                                                                                                                                                                                                                                                  | Code        |
| <b>Work</b>                                                                                                                                                                                                                                                                                                                                                                                                                                                                                                                                                                                                                                                                                                                                                                                                                                      |                                                                                                                                                                                                                                                                                                                                                           |             |
| 79                                                                                                                                                                                                                                                                                                                                                                                                                                                                                                                                                                                                                                                                                                                                                                                                                                               | <p>Does your work involve vigorous-intensity activity that causes large increases in breathing or heart rate [<i>carrying or lifting heavy loads, digging or construction work</i>] for at least 10 minutes continuously? (USE SHOWCARD)</p> <p>Yes 1</p> <p>No 2 <i>If no, go to P4</i></p>                                                              | P1          |
| 80                                                                                                                                                                                                                                                                                                                                                                                                                                                                                                                                                                                                                                                                                                                                                                                                                                               | <p>In a typical week, on how many days do you do vigorous-intensity activities as part of your work?</p> <p>Number of days <input type="text"/></p>                                                                                                                                                                                                       | P2          |
| 81                                                                                                                                                                                                                                                                                                                                                                                                                                                                                                                                                                                                                                                                                                                                                                                                                                               | <p>How much time do you spend doing vigorous-intensity activities at work on a typical day?</p> <p>Hours: minutes <input type="text"/> : <input type="text"/></p> <p>hrs mins</p>                                                                                                                                                                         | P3<br>(a-b) |
| 82                                                                                                                                                                                                                                                                                                                                                                                                                                                                                                                                                                                                                                                                                                                                                                                                                                               | <p>Does your work involve moderate-intensity activity that causes small increases in breathing or heart rate [<i>brisk walking, carrying light loads, manual washing clothes, mopping of floor, gardening at home</i>] for at least 10 minutes continuously?</p> <p>[INSERT EXAMPLES] (USE SHOWCARD)</p> <p>Yes 1</p> <p>No 2 <i>If no, go to P 7</i></p> | P4          |
| 83                                                                                                                                                                                                                                                                                                                                                                                                                                                                                                                                                                                                                                                                                                                                                                                                                                               | <p>In a typical week, on how many days do you do moderate-intensity activities as part of your work?</p> <p>Number of days <input type="text"/></p>                                                                                                                                                                                                       | P5          |
| 84                                                                                                                                                                                                                                                                                                                                                                                                                                                                                                                                                                                                                                                                                                                                                                                                                                               | <p>How much time do you spend doing moderate-intensity activities at work on a typical day?</p> <p>Hours: minutes <input type="text"/> : <input type="text"/></p> <p>hrs mins</p>                                                                                                                                                                         | P6<br>(a-b) |
| <b>Travel to and from places</b>                                                                                                                                                                                                                                                                                                                                                                                                                                                                                                                                                                                                                                                                                                                                                                                                                 |                                                                                                                                                                                                                                                                                                                                                           |             |
| <p>The next questions exclude the physical activities at work that you have already mentioned. Now I would like to ask you about the usual way you travel to and from places. For example to work, for shopping, to market, to place of worship.</p>                                                                                                                                                                                                                                                                                                                                                                                                                                                                                                                                                                                             |                                                                                                                                                                                                                                                                                                                                                           |             |
| 85                                                                                                                                                                                                                                                                                                                                                                                                                                                                                                                                                                                                                                                                                                                                                                                                                                               | <p>Do you walk or use a bicycle (<i>pedal cycle</i>) for at least 10 minutes continuously to get to and from places?</p> <p>Yes 1</p> <p>No 2 <i>If no, go to P 10</i></p>                                                                                                                                                                                | P7          |
| 86                                                                                                                                                                                                                                                                                                                                                                                                                                                                                                                                                                                                                                                                                                                                                                                                                                               | <p>In a typical week, on how many days do you walk or bicycle for at least 10 minutes continuously to get to and from places?</p> <p>Number of days <input type="text"/></p>                                                                                                                                                                              | P8          |
| 87                                                                                                                                                                                                                                                                                                                                                                                                                                                                                                                                                                                                                                                                                                                                                                                                                                               | <p>How much time do you spend walking or bicycling for travel on a typical day?</p> <p>Hours: minutes <input type="text"/> : <input type="text"/></p> <p>hrs mins</p>                                                                                                                                                                                     | P9<br>(a-b) |

| Physical activity continued                                                                                                                                                                                                                |                                                                                                                                                                                                                                                                                                     |                                                                        |              |
|--------------------------------------------------------------------------------------------------------------------------------------------------------------------------------------------------------------------------------------------|-----------------------------------------------------------------------------------------------------------------------------------------------------------------------------------------------------------------------------------------------------------------------------------------------------|------------------------------------------------------------------------|--------------|
| Question                                                                                                                                                                                                                                   |                                                                                                                                                                                                                                                                                                     | Response                                                               | Code         |
| <b>Recreational activity</b>                                                                                                                                                                                                               |                                                                                                                                                                                                                                                                                                     |                                                                        |              |
| The next questions exclude the work and transport activities that you have already mentioned. Now I would like to ask you about sports, fitness and recreational activities (leisure) like cycling, swimming, volleyball, badminton, yoga. |                                                                                                                                                                                                                                                                                                     |                                                                        |              |
| 88                                                                                                                                                                                                                                         | Do you do any vigorous-intensity sports, fitness or recreational (leisure) activities that cause large increases in breathing or heart rate [ <i>running or football</i> ] for at least 10 minutes continuously?<br><br>(USE SHOWCARD)                                                              | Yes 1<br><br>No 2 <i>If no, go to P 13</i>                             | P10          |
| 89                                                                                                                                                                                                                                         | In a typical week, on how many days do you do vigorous-intensity sports, fitness or recreational (leisure) activities?                                                                                                                                                                              | Number of days <input type="text"/>                                    | P11          |
| 90                                                                                                                                                                                                                                         | How much time do you spend doing vigorous-intensity sports, fitness or recreational activities on a typical day?                                                                                                                                                                                    | Hours: minutes <input type="text"/> : <input type="text"/><br>hrs mins | P12<br>(a-b) |
| 91                                                                                                                                                                                                                                         | Do you do any moderate-intensity sports, fitness or recreational (leisure) activities that cause a small increase in breathing or heart rate [ <i>brisk walking, cycling, swimming, volleyball, badminton, yoga</i> ] for at least 10 minutes continuously?<br><br>[INSERT EXAMPLES] (USE SHOWCARD) | Yes 1<br><br>No 2 <i>If no, go to P16</i>                              | P13          |
| 92                                                                                                                                                                                                                                         | In a typical week, on how many days do you do moderate-intensity sports, fitness or recreational (leisure) activities?                                                                                                                                                                              | Number of days <input type="text"/>                                    | P14          |
| 93                                                                                                                                                                                                                                         | How much time do you spend doing moderate-intensity sports, fitness or recreational (leisure) activities on a typical day?                                                                                                                                                                          | Hours: minutes <input type="text"/> : <input type="text"/><br>hrs mins | P15<br>(a-b) |

| Sedentary behaviour                                                                                                                                                                                                                                                                                                                         |                                                                           |                                                                        |              |
|---------------------------------------------------------------------------------------------------------------------------------------------------------------------------------------------------------------------------------------------------------------------------------------------------------------------------------------------|---------------------------------------------------------------------------|------------------------------------------------------------------------|--------------|
| The following question is about sitting or reclining at work, at home, getting to and from places, or with friends including time spent sitting at a desk, sitting with friends, travelling in car or bus, reading, playing cards or watching television, but does not include time spent sleeping.<br><br>[INSERT EXAMPLES] (USE SHOWCARD) |                                                                           |                                                                        |              |
| 94                                                                                                                                                                                                                                                                                                                                          | How much time do you usually spend sitting or reclining on a typical day? | Hours: minutes <input type="text"/> : <input type="text"/><br>hrs mins | P16<br>(a-b) |

| Housing and energy (Indoor air pollution)        |                                                                                               |                                                                                                                                                                                                                                                                                                                                                                                                  |                                                       |
|--------------------------------------------------|-----------------------------------------------------------------------------------------------|--------------------------------------------------------------------------------------------------------------------------------------------------------------------------------------------------------------------------------------------------------------------------------------------------------------------------------------------------------------------------------------------------|-------------------------------------------------------|
| The next questions ask about housing and energy. |                                                                                               |                                                                                                                                                                                                                                                                                                                                                                                                  |                                                       |
| Question                                         | Response                                                                                      | Code                                                                                                                                                                                                                                                                                                                                                                                             |                                                       |
| 95                                               | Observe the roof material of house<br><br>(Don't ask the participants, just observe yourself) | Grass/leaves/reeds/thatch/wood/<br>mud/bamboo or mixed 1<br>Stone 2<br>Concrete 3<br>Tiles, slate, shingles 4<br>Bricks, stones and lime 5<br>Corrugated iron, zinc or other metal<br>sheets 6<br>Others 7 (If others go to X5<br>other)<br>Others (Please specify) <input type="checkbox"/> <input type="checkbox"/> <input type="checkbox"/> <input type="checkbox"/> <input type="checkbox"/> | X5<br><br><br><br><br><br><br><br><br><br>X5<br>Other |
| 96                                               | Observe the wall materials of house                                                           | Grass/leaves/reeds/bamboos /thatch<br>or mixed 1<br>Mud/dirt 2<br>Unfired bricks 3<br>Wood 4<br>Fired bricks 5<br>Stone 6<br>Cement concrete 7<br>Others 8 (If others go to X6<br>other)<br>Others (please specify) <input type="checkbox"/> <input type="checkbox"/> <input type="checkbox"/> <input type="checkbox"/> <input type="checkbox"/>                                                 | X6<br><br><br><br><br><br><br><br><br><br>X6<br>Other |
| 97                                               | Observe the floor materials of house                                                          | Mud/dirt 1<br>Wood/planks 2<br>Bamboo or logs 3<br>Cement 4<br>Bricks, stones and lime 5<br>Others 6 (If others go to X7<br>other)<br>Others (please specify) <input type="checkbox"/> <input type="checkbox"/> <input type="checkbox"/> <input type="checkbox"/> <input type="checkbox"/>                                                                                                       | X7<br><br><br><br><br><br><br><br><br><br>X7<br>Other |
| 98                                               | Do you have a separate room that is used as a kitchen?                                        | Yes 1<br>No 2                                                                                                                                                                                                                                                                                                                                                                                    | X8                                                    |
| 99                                               | What is the main fuel for cooking in your house?                                              | Wood/timber 1<br>Kerosene 2<br>LPG 3<br>Cow dung 4<br>Bio-gas 5<br>Straw and thatch 6<br>Others 9 (If others go to X9<br>other)<br>Others (please specify) <input type="checkbox"/> <input type="checkbox"/> <input type="checkbox"/> <input type="checkbox"/> <input type="checkbox"/>                                                                                                          | X9<br><br><br><br><br><br><br><br><br><br>X9<br>Other |



| Housing and energy continued |                                                     |                                                                                                                                                                                                                                                                                                                   |                                 |
|------------------------------|-----------------------------------------------------|-------------------------------------------------------------------------------------------------------------------------------------------------------------------------------------------------------------------------------------------------------------------------------------------------------------------|---------------------------------|
| Question                     | Response                                            | Code                                                                                                                                                                                                                                                                                                              |                                 |
| 100                          | What type of stove do you use in house              | <p>Open fire 1</p> <p>Mud stove 2</p> <p>Smokeless stove 3</p> <p>Kerosene stove 4</p> <p>Gas stove 5</p> <p>Others 6 (If others go to X10 other)</p> <p>Others (please specify) <input type="checkbox"/> <input type="checkbox"/> <input type="checkbox"/> <input type="checkbox"/> <input type="checkbox"/></p> | <p>X10</p> <p>X10<br/>Other</p> |
| 101                          | What is the main source of lighting for your house? | <p>Kerosene 1</p> <p>Pine wood fuel 2</p> <p>Solar 3</p> <p>Candle 4</p> <p>Electricity 5</p> <p>Others 6 (If others go to X11 other)</p> <p>Others (please specify) <input type="checkbox"/> <input type="checkbox"/> <input type="checkbox"/> <input type="checkbox"/> <input type="checkbox"/></p>             | <p>X11</p> <p>X11<br/>Other</p> |

| History of raised blood pressure |                                                                                                                 |                             |      |
|----------------------------------|-----------------------------------------------------------------------------------------------------------------|-----------------------------|------|
| Question                         |                                                                                                                 | Response                    | Code |
| 102                              | Have you ever had your blood pressure measured by a doctor or other health worker?                              | Yes 1                       | H1   |
|                                  |                                                                                                                 | No 2 <i>If no, go to H6</i> |      |
| 103                              | Have you ever been told by a doctor or other health worker that you have raised blood pressure or hypertension? | Yes 1                       | H2a  |
|                                  |                                                                                                                 | No 2 <i>If no, go to H6</i> |      |
| 104                              | Have you been told in the past 12 months?                                                                       | Yes 1                       | H2b  |
|                                  |                                                                                                                 | No 2                        |      |

|     |                                                                                                                                           |               |     |
|-----|-------------------------------------------------------------------------------------------------------------------------------------------|---------------|-----|
| 105 | Are you currently receiving any of the following treatments/advice for high blood pressure prescribed by a doctor or other health worker? |               |     |
|     | Drugs (medication) that you have taken in the past two weeks                                                                              | Yes 1<br>No 2 | H3a |
|     | Advice to reduce salt intake                                                                                                              | Yes 1<br>No 2 | H3b |
|     | Advice or treatment to lose weight                                                                                                        | Yes 1<br>No 2 | H3c |
|     | Advice or treatment to stop smoking                                                                                                       | Yes 1<br>No 2 | H3d |
|     | Advice to start or do more exercise                                                                                                       | Yes 1<br>No 2 | H3e |
| 106 | Have you ever seen a traditional healer for raised blood pressure or hypertension?                                                        | Yes 1<br>No 2 | H4  |
| 107 | Are you currently taking any herbal or traditional remedy for your raised blood pressure?                                                 | Yes 1<br>No 2 | H5  |

| History of diabetes |                                                                                                                                |                                      |     |
|---------------------|--------------------------------------------------------------------------------------------------------------------------------|--------------------------------------|-----|
| Question            | Response                                                                                                                       | Code                                 |     |
| 108                 | Have you ever had your blood glucose measured by a doctor or other health worker?                                              | Yes 1<br>No 2 <i>If no, go to M1</i> | H6  |
| 109                 | Have you ever been told by a doctor or other health worker that you have raised blood glucose or diabetes?                     | Yes 1<br>No 2 <i>If no, go to M1</i> | H7a |
| 110                 | Have you been told in the past 12 months?                                                                                      | Yes 1<br>No 2                        | H7b |
| 111                 | Are you currently receiving any of the following treatments/advice for diabetes prescribed by a doctor or other health worker? |                                      |     |
|                     | Insulin                                                                                                                        | Yes 1<br>No 2                        | H8a |
|                     | Drugs (medication) that you have taken in the past two weeks                                                                   | Yes 1<br>No 2                        | H8b |
|                     | Special prescribed diet                                                                                                        | Yes 1<br>No 2                        | H8c |
|                     | Advice or treatment to lose weight                                                                                             | Yes 1<br>No 2                        | H8d |
|                     | Advice or treatment to stop smoking                                                                                            | Yes 1<br>No 2                        | H8e |
|                     | Advice to start or do more exercise                                                                                            | Yes 1<br>No 2                        | H8f |
| 112                 | Have you ever seen a traditional healer for diabetes or raised blood glucose?                                                  | Yes 1<br>No 2                        | H9  |
| 113                 | Are you currently taking any herbal or traditional remedy for your diabetes?                                                   | Yes 1<br>No 2                        | H10 |

## STEP II. Physical measurements

| CORE: Height and weight          |                                                                                                                                                   |                                |      |
|----------------------------------|---------------------------------------------------------------------------------------------------------------------------------------------------|--------------------------------|------|
| Question                         | Response                                                                                                                                          |                                | Code |
| 114                              | Interviewer ID                                                                                                                                    | □□□□                           | M1   |
| 115                              | Device IDs for height and weight                                                                                                                  | Height □□□                     | M2a  |
|                                  |                                                                                                                                                   | Weight □□□                     | M2b  |
| 116                              | Height                                                                                                                                            | in centimetres (cm) □□□□.□     | M3   |
| 117                              | Weight                                                                                                                                            | in kilograms (kg) □□□□.□       | M4   |
|                                  | <i>If too large for scale 666.6</i>                                                                                                               |                                |      |
| 118                              | <b>For women:</b> Are you pregnant?                                                                                                               | Yes 1 <i>If yes, go to M 8</i> | M5   |
|                                  |                                                                                                                                                   | No 2                           |      |
| CORE: Waist                      |                                                                                                                                                   |                                |      |
| 119                              | Device ID for waist                                                                                                                               | □□□                            | M6   |
| 120                              | Waist circumference                                                                                                                               | in Centimetres (cm) □□□□.□     | M7   |
| CORE: Blood pressure             |                                                                                                                                                   |                                |      |
| 121                              | Interviewer ID                                                                                                                                    | □□□□                           | M8   |
| 122                              | Device ID for blood pressure                                                                                                                      | □□□                            | M9   |
| 123                              | Cuff size used                                                                                                                                    | Small 1                        | M10  |
|                                  |                                                                                                                                                   | Medium 2                       |      |
|                                  |                                                                                                                                                   | Large 3                        |      |
| 124                              | Reading 1                                                                                                                                         | Systolic ( mmHg) □□□□          | M11a |
|                                  |                                                                                                                                                   | Diastolic (mmHg) □□□□          | M11b |
| 125                              | Reading 2                                                                                                                                         | Systolic ( mmHg) □□□□          | M12a |
|                                  |                                                                                                                                                   | Diastolic (mmHg) □□□□          | M12b |
| 126                              | Reading 3                                                                                                                                         | Systolic ( mmHg) □□□□          | M13a |
|                                  |                                                                                                                                                   | Diastolic (mmHg) □□□□          | M13b |
| 127                              | During the past two weeks, have you been treated for raised blood pressure with drugs (medication) prescribed by a doctor or other health worker? | Yes 1                          | M14  |
|                                  |                                                                                                                                                   | No 2                           |      |
| Hip circumference and heart rate |                                                                                                                                                   |                                |      |
| 128                              | Hip circumference                                                                                                                                 | in centimetres (cm) □□□□.□     | M15  |
| 129                              | Heart rate                                                                                                                                        |                                |      |
|                                  | Reading 1                                                                                                                                         | Beats per minute □□□□          | M16a |
|                                  | Reading 2                                                                                                                                         | Beats per minute □□□□          | M16b |
|                                  | Reading 3                                                                                                                                         | Beats per minute □□□□          | M16c |

### STEP III Biochemical measurements

| Blood glucose                     |                                                                                                                                                                       |      |
|-----------------------------------|-----------------------------------------------------------------------------------------------------------------------------------------------------------------------|------|
| Question                          | Response                                                                                                                                                              | Code |
| 130                               | During the past 12 hours have you had anything to eat or drink, other than water?<br><br>Yes 1<br>No 2                                                                | B1   |
| 131                               | Technician ID<br><br> _ _ _ _                                                                                                                                         | B2   |
| 132                               | Device ID<br><br> _ _                                                                                                                                                 | B3   |
| 133                               | Time of day blood specimen taken (24 hour clock)<br><br>Hours: minutes<br> _ _  :  _ _ <br>hrs    mins                                                                | B4   |
| 134                               | Fasting blood glucose<br><br>mg/dl    _ _ _ _ _ _ _ _                                                                                                                 | B5   |
| 135                               | Today, have you taken insulin or other drugs (medication) that have been prescribed by a doctor or other health worker for raised blood glucose?<br><br>Yes 1<br>No 2 | B6   |
| Blood lipids                      |                                                                                                                                                                       |      |
| 136                               | Device ID<br><br> _ _                                                                                                                                                 | B7   |
| 137                               | Total cholesterol<br><br>mg/dl    _ _ _ _ _ _ _ _                                                                                                                     | B8   |
| 138                               | During the past two weeks, have you been treated for raised cholesterol with drugs (medication) prescribed by a doctor or other health worker?<br><br>Yes 1<br>No 2   | B9   |
| Triglycerides and HDL cholesterol |                                                                                                                                                                       |      |
| 139                               | Triglycerides<br><br>mg/dl    _ _ _ _ _ _ _ _                                                                                                                         | B10  |
| 140                               | HDL Cholesterol<br><br>mg/dl    _ _ _ _ _ _ _ _                                                                                                                       | B11  |
